# Supplementary material
Source: PubMed Central journal article supplement (PMC8678366)
Supplement: NIHMS1756772-supplement-2.pdf [file NIHMS1756772-supplement-2.pdf]

# Supplementary material figure 2 Corrsignia MEDIA 2021

Indrani

August 27, 2021

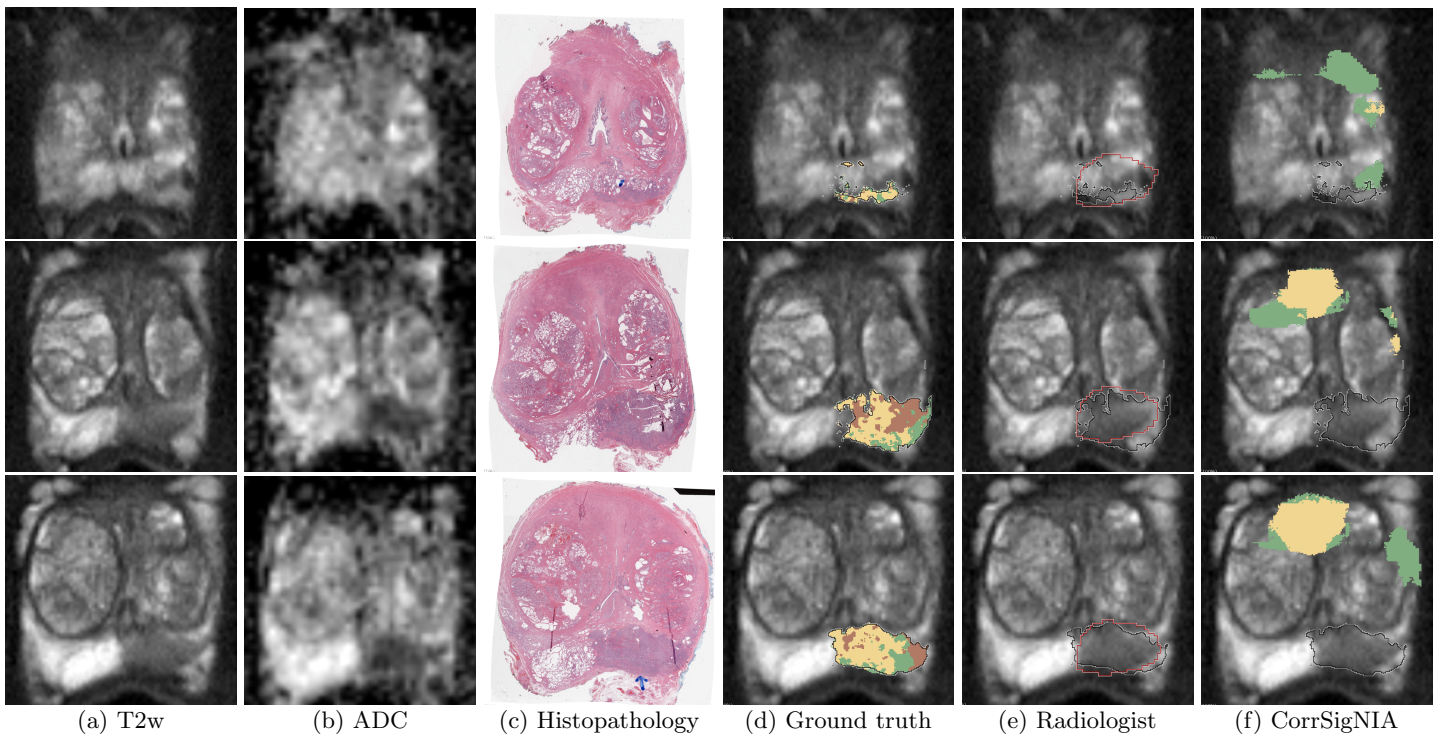

Figure 1: false negative and false positive
