# Supplementary material
Source: PubMed Central journal article supplement (PMC8678366)
Supplement: NIHMS1756772-supplement-3.pdf [file NIHMS1756772-supplement-3.pdf]

# Supplementary material figures Corrsignia MEDIA 2021

Indrani

September 1, 2021

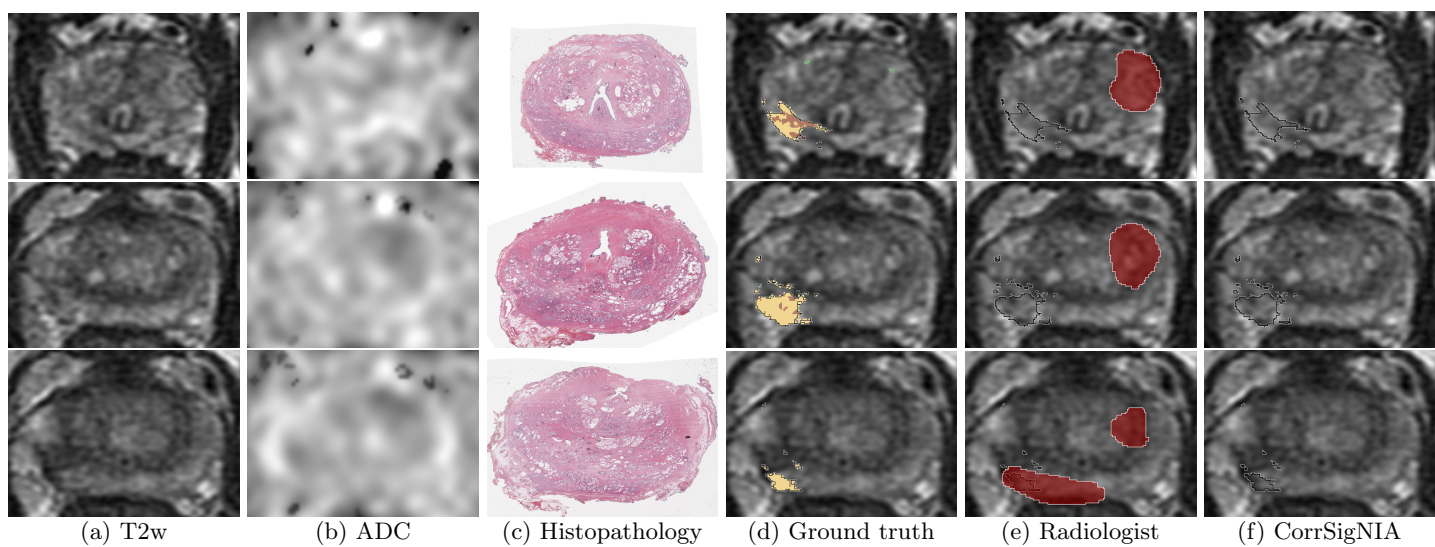

Figure 1: Caption

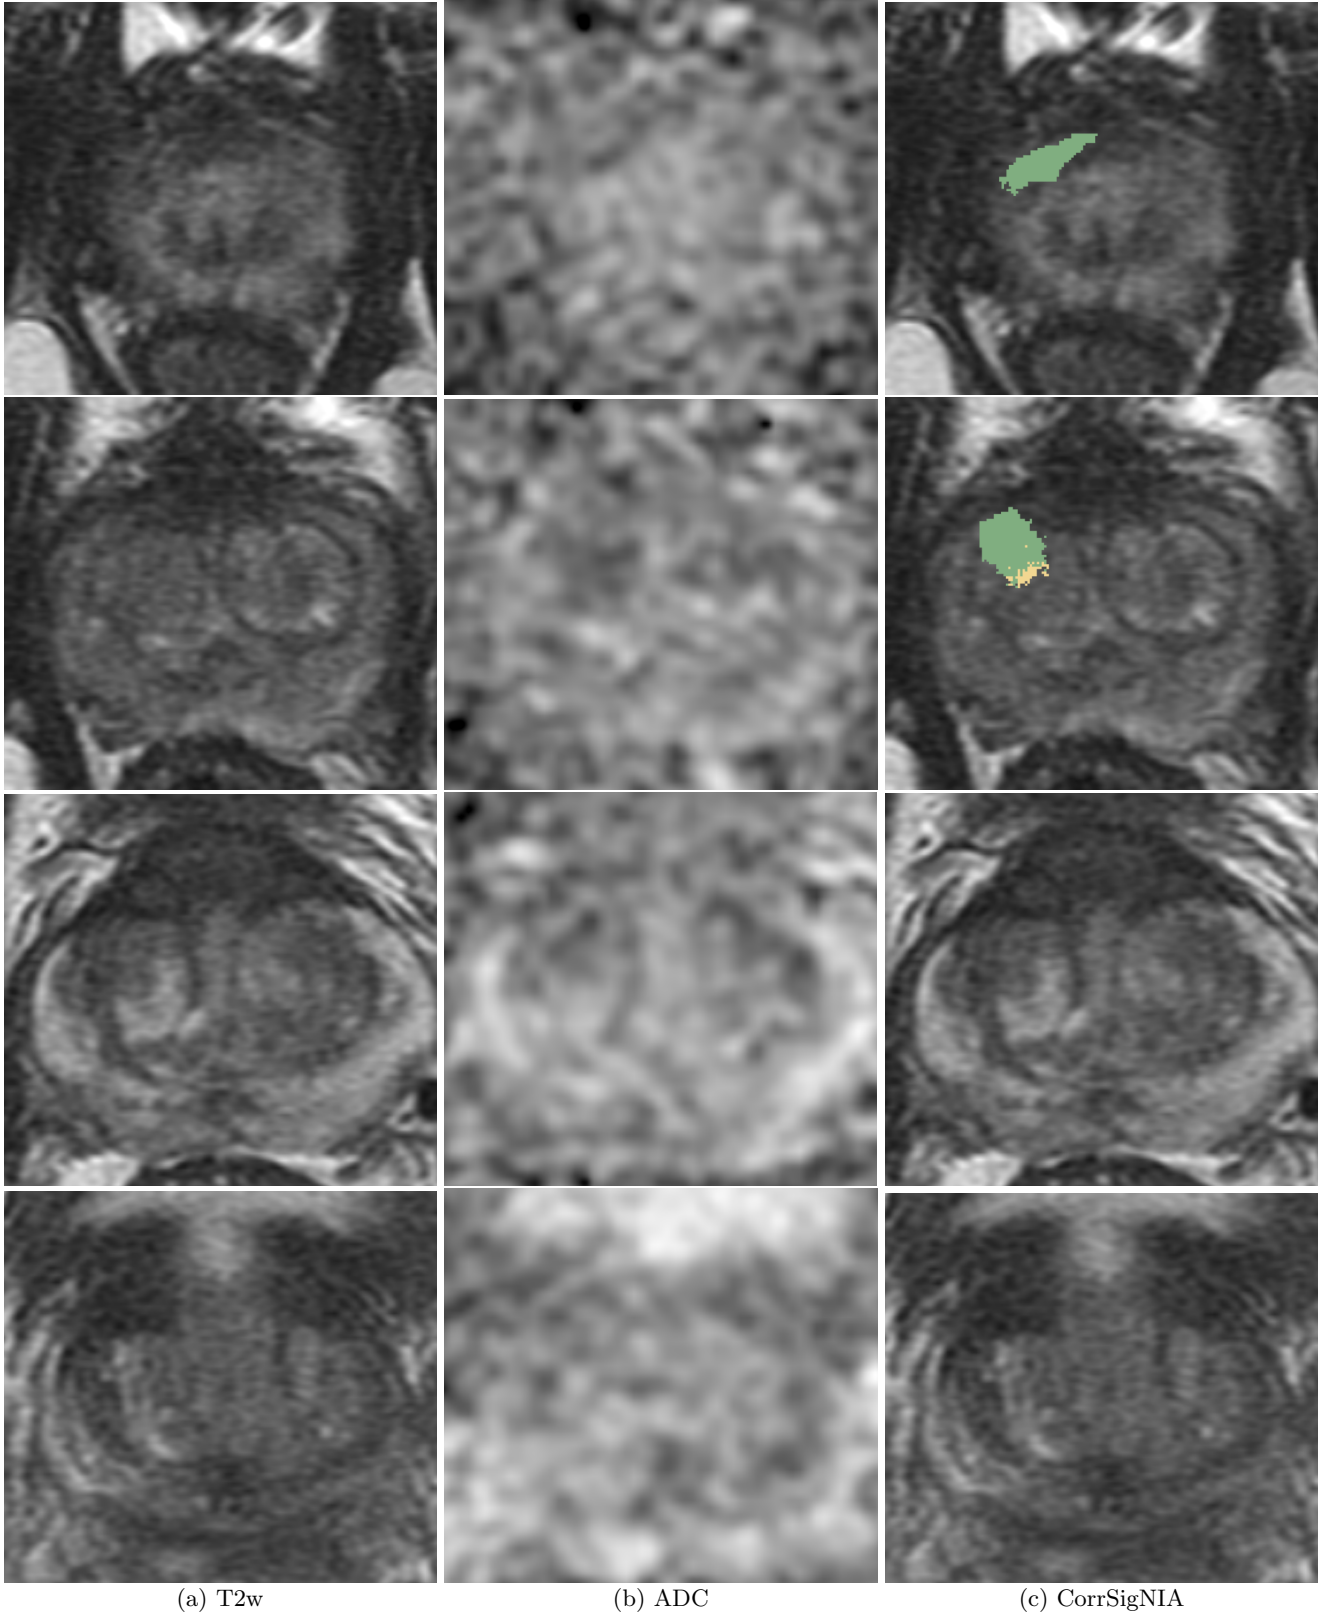

(a) T2w

(b) ADC

(c) CorrSigNIA

Figure 2: false positive
